# Supplementary material for: Ammonium ion-promoted electrochemical production of synthetic gas from water and carbon dioxide on a fluorine-doped tin oxide electrode
Source: Royal Society of Chemistry journal article supplement (doi:10.1039/d0cc08040c), 2021-01-01
Supplement: d0cc08040c1.pdf [file d0cc08040c1.pdf]

# **Ammonium ion-promoted electrochemical production of synthetic gas from water and carbon dioxide on fluorine-doped tin oxide electrode**

Shin-ichi Naya,<sup>a</sup> Hisayoshi Yoshioka,<sup>b</sup> and Hiroaki Tada<sup>b\*</sup>

<sup>a</sup> *Environmental Research Laboratory, Kindai University, 3-4-1, Kowakae, Higashi-Osaka, Osaka 577-8502, Japan.*

<sup>b</sup> *Graduate School of Science and Engineering, Kindai University, 3-4-1, Kowakae, Higashi-Osaka, Osaka 577-8502, Japan*

\*Author to whom correspondence should be addressed.

Professor Hiroaki Tada

Tel: +81-6-6721-2332; Fax: +81-6-6727-2024

E-mail: [h-tada@apch.kidai.ac.jp](mailto:h-tada@apch.kidai.ac.jp)

## Experimental

### Electrochemical measurements and characterization

Fluorine-doped tin(IV) oxide film coated on glass (FTO, Aldrich TEC7, sheet resistance =  $7 \Omega$ ) was used as the working electrode. For the linear sweep voltammogram (LSV) measurements, a three-electrode cell was fabricated with a structure of glassy carbon | 0.1 M  $\text{Na}_2\text{SO}_4$  and/or 0.1 M  $\text{NaHCO}_3$  | FTO, Ag/AgCl. Before the measurement, Ar or  $\text{CO}_2$  gas was bubbled into the electrolyte solution for 30 min. The LSVs were collected by using a galvanostat/potentiostat (HZ-7000, Hokuto Denko). X-ray diffraction (XRD) patterns were collected by means of a Rigaku SmartLab X-ray diffractometer operating at 40 kV and 100 mA. Scanning electron microscopy (SEM) images were taken by Hitachi SU8230 at an applied voltage of 20 kV. X-ray photoelectron spectroscopic (XPS) measurements were carried out by a Kratos Axis Nova X-ray photoelectron spectrometer using a monochromated Al K $\alpha$  as X-ray source with 15 kV and 10 mA. The energy reference is C1s (284.6 eV).

### Electrochemical $\text{CO}_2$ reduction reaction

A two compartment three-electrode cell was fabricated with a structure of glassy carbon | 0.1 M  $(\text{NH}_4)\text{HCO}_3$  aq. (pH 6.7) | Nafion | 0.1 M  $(\text{NH}_4)\text{HCO}_3$  aq. (pH 6.7) | FTO, Ag/AgCl. Before the measurement,  $\text{CO}_2$  gas was bubbled into the electrolyte solution in each component for 30 min. Chronoamperometry curves were obtained under  $\text{CO}_2$  flow with a constant rate of  $100 \text{ mL min}^{-1}$  by using a galvanostat/potentiostat (HSV-110, Hokuto Denko). The potential of FTO electrode was maintained at -1.3 V vs. SHE. The gaseous products were quantified by gas chromatography (GC-2010Plus with BID-detector, Shimadzu, column = Rt-Mseive 5A, Shimadzu GLC, He flow rate =  $10 \text{ mL min}^{-1}$ ). The products in the electrolyte solution were quantified by NMR (JNM-AL400, JEOL Resonance).  $\text{D}_2\text{O}$  and dimethylsulfoxide were used for the signal lock and internal standard, respectively.

### $\text{NH}_4^+$ ion adsorption

FTO nanoparticles were prepared by the reported procedure.<sup>S1</sup> Adsorption isotherm of  $\text{NH}_4^+$  ions was obtained by exposing FTO nanoparticles (100 mg) to aqueous solutions with different concentrations of  $(\text{NH}_4)\text{HCO}_3$  at  $25^\circ\text{C}$  for 3 h in the dark. The resulting FTO nanoparticles adsorbed  $\text{NH}_4^+$  ions were collected by centrifugation and dried in vacuo. After removing particles from supernatante by using membrane filter, the remaining  $\text{NH}_4^+$  ions were quantified by the indophenol blue method. Diffuse reflectance infra red Foulter transform spectroscopy (DRIFT) was measured by means of FTIR-8400S spectrometer (Shimadzu) with the diffuse reflectance unit (DRS-8000, Shimadzu).  $\zeta$ -Potential measurements were carried out using a Zetasizer Nano ZS (Malvern

Instruments). Samples were prepared by dispersing FTO (15 mg) into an aqueous solution (100 mL) of  $(\text{NH}_4)_2\text{SO}_4$  (0–20 mM), and ultrasonicated for 30 min. The samples were introduced to a disposable folded capillary cell (DTS1060). Electrophoretic mobilities were measured at 25 °C using the Malvern M3-PALS, and converted to  $\zeta$ -potential by the Henry's equation.

## Reference

S1. H. Xu, L. Shi, Z. Wang, J. Liu, J. Zhu, Y. Zhao, M. Zhang, S. Yuan, *ACS Appl. Mater. Interfaces*, 2015, 7, 27486-27493.

**Table S1** Electrocatalytic activity of the catalysts for electrochemical production of synthetic gas

| Electrocatalyst                                                     | Current density<br>mA cm <sup>-2</sup> | Faradaic efficiency |                | CO/H <sub>2</sub><br>molar ration | Electrolyte                              | Applied bias       | Reference |
|---------------------------------------------------------------------|----------------------------------------|---------------------|----------------|-----------------------------------|------------------------------------------|--------------------|-----------|
|                                                                     |                                        | CO                  | H <sub>2</sub> |                                   |                                          |                    |           |
| Sn/FTO                                                              | 2.4                                    | 30                  | 55             | 0.55                              | 0.1 M (NH <sub>4</sub> )HCO <sub>3</sub> | ∥ 0.9 V vs RHE     | This work |
| Ni/AGF                                                              | 10                                     | 50                  | 50             | 1.00                              | 0.5 M KHCO <sub>3</sub>                  | ∥ 0.6 V vs RHE     | Ref. S2   |
| Ag                                                                  | 80                                     | 33                  | 66             | 0.50                              | 0.5 M KHCO <sub>3</sub>                  | ∥ 1.8 V vs SCE     | Ref. S3   |
| [Mn(bpy)(CO) <sub>3</sub> Br]                                       | 0.3                                    | 22                  | 47             | 0.47                              | phosphate buffer                         | ∥ 1.4 V vs Ag/AgCl | Ref. S4   |
| Ru complex                                                          | 1.5                                    | 30                  | 70             | 0.43                              | 0.5 M NaHCO <sub>3</sub>                 | ∥ 1.5 V vs RHE     | Ref. S5   |
| Ru complex                                                          | 0.8                                    | 65                  | 30             | 2.17                              | 0.5 M NaHCO <sub>3</sub>                 | ∥ 1.2 V vs RHE     | Ref. S5   |
| Metal-Doped Nitrogenated Carbon                                     | 30                                     | 10                  | 90             | 0.11                              | 0.5 M KHCO <sub>3</sub>                  | ∥ 0.9 V vs RHE     | Ref. S6   |
| Ag                                                                  | 3                                      | 83                  | 12             | 6.92                              | 0.1 M KHCO <sub>3</sub>                  | ∥ 1.0 V vs RHE     | Ref. S7   |
| Ag/C                                                                | 32                                     | 70                  | 30             | 2.33                              | 0.5 M KHCO <sub>3</sub>                  | ∥ 1.5 V vs Ag/AgCl | Ref. S8   |
| Cu@SnO <sub>2</sub>                                                 | 22                                     | 90                  | 5              | 18.00                             | 0.5 M KHCO <sub>3</sub>                  | ∥ 0.9 V vs RHE     | Ref. S9   |
| Pd/C                                                                | 0.3                                    | 40                  | 50             | 0.80                              | 0.5 M KHCO <sub>3</sub>                  | ∥ 0.6 V vs RHE     | Ref. S10  |
| Au film                                                             | 30                                     | -                   | -              | 14.00                             | 0.5 M KHCO <sub>3</sub>                  | ∥ 0.65 V vs RHE    | Ref. S11  |
| Cu on Au film                                                       | 20                                     | -                   | -              | 0.66                              | 0.5 M KHCO <sub>3</sub>                  | ∥ 0.65 V vs RHE    | Ref. S11  |
| Cu-In                                                               | 0.8                                    | 32                  | 30             | 1.07                              | 0.1 M KHCO <sub>3</sub>                  | ∥ 0.9 V vs RHE     | Ref. S12  |
| Co <sub>3</sub> O <sub>4</sub> -CDots-C <sub>3</sub> N <sub>4</sub> | 1                                      | 90                  | 10             | 9.00                              | 0.5 M KHCO <sub>3</sub>                  | ∥ 0.6 V vs RHE     | Ref. S13  |
| Au/Titanate                                                         | 45                                     | 70                  | 30             | 2.33                              | 0.5 M KHCO <sub>3</sub>                  | ∥ 0.9 V vs RHE     | Ref. S14  |
| Zn                                                                  | 12                                     | 25                  | 60             | 0.42                              | 0.1 M KHCO <sub>3</sub>                  | ∥ 0.9 V vs RHE     | Ref. S15  |
| porous Sn                                                           | -                                      | 30                  | 60             | 0.50                              | 0.1 M NaHCO <sub>3</sub>                 | ∥ 0.6 V vs RHE     | Ref. S16  |
| AgP <sub>2</sub>                                                    | 13                                     | 38                  | 62             | 0.61                              | 0.5 M KHCO <sub>3</sub>                  | ∥ 0.6 V vs RHE     | Ref. S17  |
| 0.1 %BDD                                                            | -                                      | 29                  | 42             | 0.69                              | 0.1 M KClO <sub>4</sub>                  | ∥ 2.1 V vs Ag/AgCl | Ref. S18  |
| 0.1 %BDD                                                            | -                                      | 2.6                 | 15             | 0.17                              | 0.1 MKCl                                 | ∥ 2.1 V vs Ag/AgCl | Ref. S18  |
| Sn                                                                  | -                                      | 3.4                 | 3.9            | 0.87                              | 0.1 M KClO <sub>4</sub>                  | ∥ 2.0 V vs Ag/AgCl | Ref. S18  |
| Sn                                                                  | -                                      | 2.6                 | 5.4            | 0.48                              | 0.1 M KCl                                | ∥ 2.0 V vs Ag/AgCl | Ref. S18  |
| Zn <sub>x</sub> Cd <sub>1-x</sub> S-Amine                           | 25                                     | 60                  | 40             | 1.50                              | 0.5 M NaHCO <sub>3</sub>                 | ∥ 1.16 V vs RHE    | Ref. S19  |
| Ag-SnS <sub>2</sub>                                                 | 38.8                                   | 20.5                | 19.5           | 1.05                              | 0.5 M KHCO <sub>3</sub>                  | ∥ 1.0 V vs RHE     | Ref. S20  |
| Au                                                                  | 0.36                                   | 52                  | 48             | 1.08                              | 0.25 M KHCO <sub>3</sub>                 | ∥ 0.8 V vs RHE     | Ref. S21  |
| Co single atom-graphite-Co nanoparticle                             | 10                                     | 45                  | 50             | 0.90                              | 0.1 M KHCO <sub>3</sub>                  | ∥ 0.8 V vs RHE     | Ref. S22  |
| ZnO (Lattice Perfect)                                               | 22                                     | 22                  | 65             | 0.34                              | 0.1 M KHCO <sub>3</sub>                  | ∥ 1.4 V vs RHE     | Ref. S23  |
| ZnO (Lattice distorted)                                             | 25                                     | 65                  | 32             | 2.03                              | 0.1 M KHCO <sub>3</sub>                  | ∥ 1.4 V vs RHE     | Ref. S23  |
| CoNi-NC                                                             | 50                                     | 55                  | 43             | 1.28                              | 0.5 M KHCO <sub>3</sub>                  | ∥ 0.9 V vs RHE     | Ref. S24  |
| Pd/niobium nitride                                                  | 1.6                                    | 68                  | 28             | 2.43                              | 0.5 M KHCO <sub>3</sub>                  | ∥ 0.9 V vs RHE     | Ref. S25  |
| Au@Co <sub>3</sub> O <sub>4</sub>                                   | 33                                     | 48                  | 52             | 0.92                              | 0.1 M KHCO <sub>3</sub>                  | ∥ 2.0 V vs SCE     | Ref. S26  |
| Fe-NC                                                               | 2                                      | 60                  | 40             | 1.50                              | 0.1 M KHCO <sub>3</sub>                  | ∥ 0.6 V vs RHE     | Ref. S27  |
| Zn/Ni                                                               | 8.5                                    | 50                  | 40             | 1.25                              | 0.1 M KCl                                | ∥ 0.9 V vs RHE     | Ref. S28  |
| ZnO-CNT                                                             | 0.2                                    | 25                  | 75             | 0.33                              | 0.1 M KHCO <sub>3</sub>                  | ∥ 0.9 V vs RHE     | Ref. S29  |
| Ag/TiO <sub>2</sub>                                                 | 110                                    | 80                  | 20             | 4.00                              | 0.1 M KOH                                | ∥ 0.6 V vs RHE     | Ref. S30  |

## Reference

- S2. T. Yamamoto, D. A. Tryk, A. Fujishima and H. Ohata, *Electrochimica Acta*, 2002, **47**, 3327-3334.
- S3. C. Delacourt, P. L. Eidway, H. B. Kerr, J. Newman, *J. Electrochem. Soc.*, 2008, **155**, B42.
- S4. J. J. Walch, G. Neri, C. L. Smith and A. J. Cowan, *Chem. Commun.*, 2014, **50**, 12698-12701.
- S5. P. Kang, Z. Chem, A Nayak, S. Zhang and T. J. Meyer, *Energy. Environ. Sci.* 2014, **7**, 4007-4012.
- S6. A. S. Varela, N. R. Sahraie, J. Steinberg, W. Ju, H.-S. Oh and P. Strasser, *Angew. Chem. Int. Ed.*, 2015, **54**, 10758-10762.

- S7. M. R. Singh, Y. Kwon, Y. Lum, J. W. Ager, III, and A. T. Bell, *J. Am. Chem. Soc.*, 2016, **138**, 13006-13012.
- S8. Y. C. Li, D. Zhou, Z. Yan, R. H. Gonçalves, D. A. Salvatore, C. P. Berlinguette and T. E. Mallouk, *ACS Energy Lett.*, 2016, **1**, 1149-1153.
- S9. Q. Li, J. Fu, W. Zhu, Z. Chen, B. Shen, L. Wu, Z. Xi, T. Wang, G. Lu, J.-j. Zhu and S. Sun, *J. Am. Chem. Soc.*, 2017, **139**, 4290-4293.
- S10. W. Sheng, S. Kattel, S. Yao, B. Yan, Z. Liang, C. J. Hawxhurst, Q. Wu and J. G. Chen, *Energy Env. Sci.*, 2017, **10**, 1180-1185.
- S11. M. B. Ross, C. T. Dinh, Y. Li, D. Kim, P. D. Luna, E. H. Sargent and P. Yang, *J. Am. Chem. Soc.*, 2017, **139**, 9359-9363.
- S12. Z. B. Hoffman, T. S. Gray, K. B. Moraveck, T. B. Gunnoe, G. Zangari, *ACS Catal.*, 2017, **7**, 5381-5390.
- S13. S. Guo, S. Zhao, X. Wu, H. Li, Y. Zhou, C. Zhu, N. Yang, X. Jiang, J. Gao, L. Bai, Y. Liu, Y. Lifshitz, S.-T. Lee and Z. Kang, *Nat. Commun.*, 2018, **8**, 1038/1-9.
- S14. F. M. Mota, D. L. T. Nguyen, J.-E. Lee, H. Piao, J.-H. Choy, Y. J. Hwang and D. H. Kim, *ACS Catal.*, 2018, **8**, 4364-4374.
- S15. B. Qin, Y. Li, H. Fu, H. Wang, S. Chen, Z. Liu and F. Peng, *ACS Appl. Mater. Interfaces*, 2018, **10**, 20530-20539.
- S16. H. Kim, H. Lee, T. Lim and S. H. Ahn, *J. Ind. Engin. Chem.*, 2018, **66**, 248.
- S17. H. Li, P. Wen, D. S. Itanze, Z. D. Hood, X. Ma, M. Kim, S. Adhikari, C. Lu, C. Dun, M. Chi, Y. Qiu and S. M. Geyer, *Nat. Commun.*, 2019, **10**, 5724/1-10.
- S18. M. Tomisaki, S. Kasahara, K. Natsui, N. Ikemiya and Y. Einaga, *J. Am. Chem. Soc.*, 2019, **141**, 7414-7420.
- S19. N. Meng, C. Liu, Y. Liu, Y. Yu and B. Zhang, *Angew. Chem. Int. Ed.*, 2019, **58**, 18908-18912.
- S20. R. He, X. Yuan, P. Shao, T. Duan and W. Zhu, *Small*, 2019, **15**, 1904882/1-7.
- S21. A. S. Malkani, J. Anibal and B. Xu, *ACS Catal.*, 2020, **10**, 14871-14876.
- S22. R. Daiyan, R. Chen, P. Kumar, N. M. Bedford, J. Qu, J. M. Cairney, X. Lu and R. Amal, *ACS Appl. Mater. Interfaces*, 2020, **12**, 9307-9315.
- S23. B. Qin, Q. Zhang, Y.-H. Li, G. Yang and F. Peng, *ACS Appl. Mater. Interfaces*, 2020, **12**, 30466-30473.
- S24. Q. He, D. Liu, J. H. Lee, Y. Liu, Z. Xie, S. Hwang, S. Kattel, L. Song and J. G. Chen, *Angew. Chem. Int. Ed.*, 2020, **59**, 3033-3037.
- S25. Y. Liu, D. Tian, A. N. Biswas, Z. Xie, S. Hwang, J. H. Lee, H. Meng and J. G. Chen, *Angew. Chem. Int. Ed.*, 2020, **59**, 11345-11348.
- S26. S.-Y. Zhang, J.-J. Ma, H.-L. Zhu and Y.-Q. Zheng, *New. J. Chem.*, 2020, **44**, 11808-11816.

- S27. J. Zhao, J. Deng, J. Han, S. Imhanria, K. Chen and W. Wankg, *Chem. Engin. J.*, 2020, 389, 124323/1-7.
- S28. M. Beheshti, S. Kakooei, M. C. Ismail and S. Shahrestani, *Electrochimica Acta*, 2020, 341, 135976/1-8.
- S29. I. Hjorth, Y. Wang, Y. Li, M. E. M. Buan, M. Nord, M. Rønning, J. Yang and D. Chen, *Catal. Today*, DOI: <https://doi.org/10.1016/j.cattod.2020.03.055>.
- S30. Y. E. Kim, B. Kim, W. Lee, Y. N. Ko, M. H. Youn, S. K. Jeong, K. T. Park and J. Oh, *Chem. Engin. J.*, DOI: <https://doi.org/10.1016/j.cej.2020.127448>

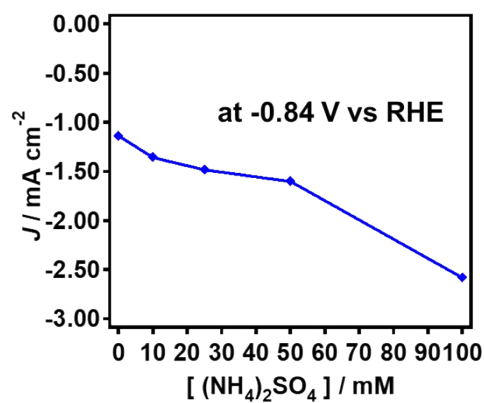

**Fig. S1.** Relation between the current densities at  $E = -0.84$  V vs. RHE in 0.1 M Na<sub>2</sub>SO<sub>4</sub>-0.1 M NaHCO<sub>3</sub> containing various concentrations of (NH<sub>4</sub>)<sub>2</sub>SO<sub>4</sub>.

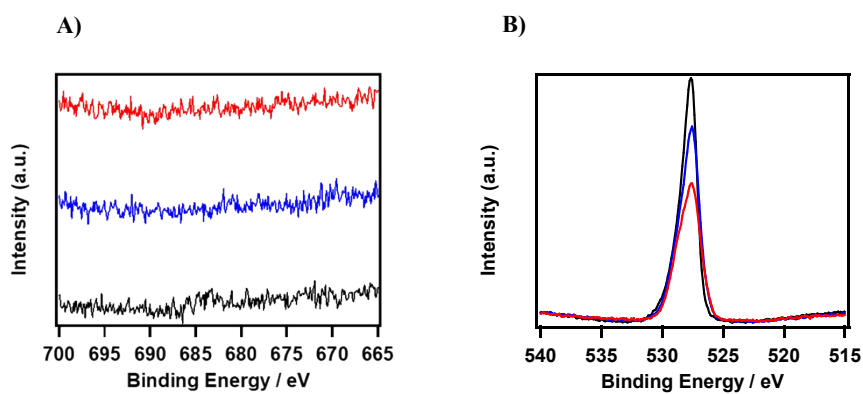

**Fig. S2.** F1s- and O1s-XPS spectra of FTO electrodes before (black), after 30-min electrolysis in 0.1 M Na<sub>2</sub>SO<sub>4</sub>-0.1 M NaHCO<sub>3</sub> aq. (blue), and after 30-min electrolysis in 0.1 M Na<sub>2</sub>SO<sub>4</sub>-0.1 M NaHCO<sub>3</sub>-0.1 M (NH<sub>4</sub>)<sub>2</sub>SO<sub>4</sub> aq. (red).

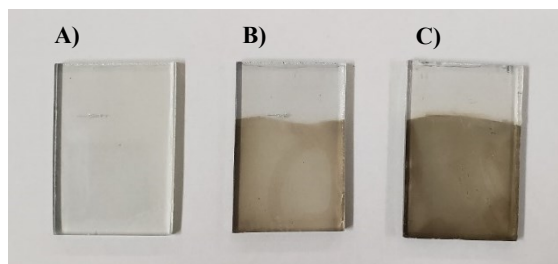

**Fig. S3.** Pictures of FTO electrodes before (A), after 30-min electrolysis in 0.1 M  $\text{Na}_2\text{SO}_4$ -0.1 M  $\text{NaHCO}_3$  aq. (B), and after 30-min electrolysis in 0.1 M  $\text{Na}_2\text{SO}_4$ -0.1 M  $\text{NaHCO}_3$ -0.1 M  $(\text{NH}_4)_2\text{SO}_4$  aq. (C).

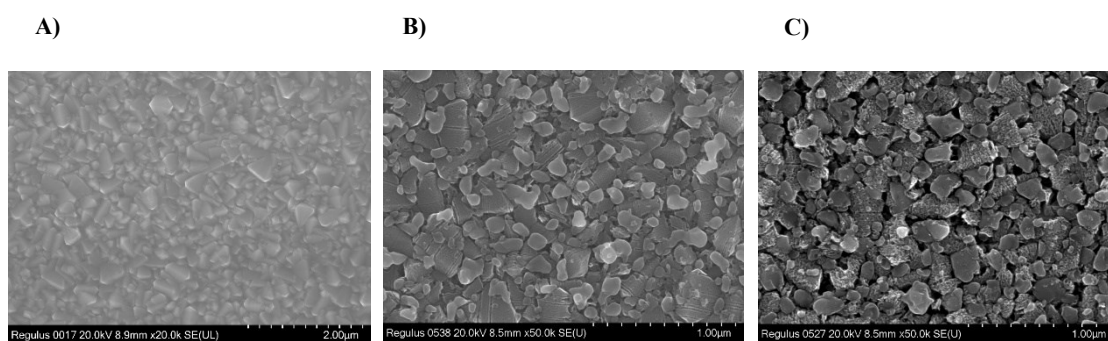

**Fig. S4.** SEM image of the surface of FTO electrodes before (A), after 30-min electrolysis in 0.1 M  $\text{Na}_2\text{SO}_4$ -0.1 M  $\text{NaHCO}_3$  aq. (B), and after 30-min electrolysis in 0.1 M  $\text{Na}_2\text{SO}_4$ -0.1 M  $\text{NaHCO}_3$ -0.1 M  $(\text{NH}_4)_2\text{SO}_4$  aq. (C).



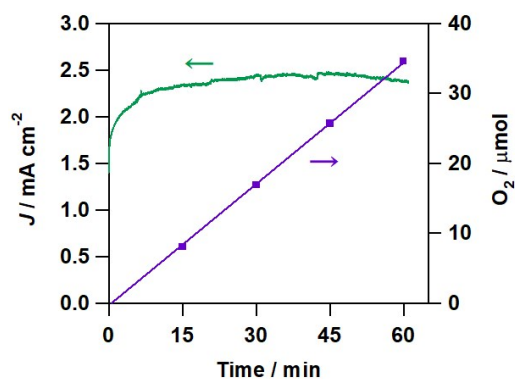

**Fig. S5.** Chronoamperometry curve and time evolution of  $\text{O}_2$  at the GC anode in a three-electrode cell with the structure of GC | 0.1 M  $(\text{NH}_4)\text{HCO}_3$  aq. (pH 6.7) | Nafion | 0.1 M  $(\text{NH}_4)\text{HCO}_3$  aq. (pH 6.7) | FTO, Ag/AgCl under  $\text{CO}_2$  flow with a constant rate of  $100 \text{ mL min}^{-1}$ . The potential of FTO electrode was maintained at  $-1.3 \text{ V vs. SHE}$ .

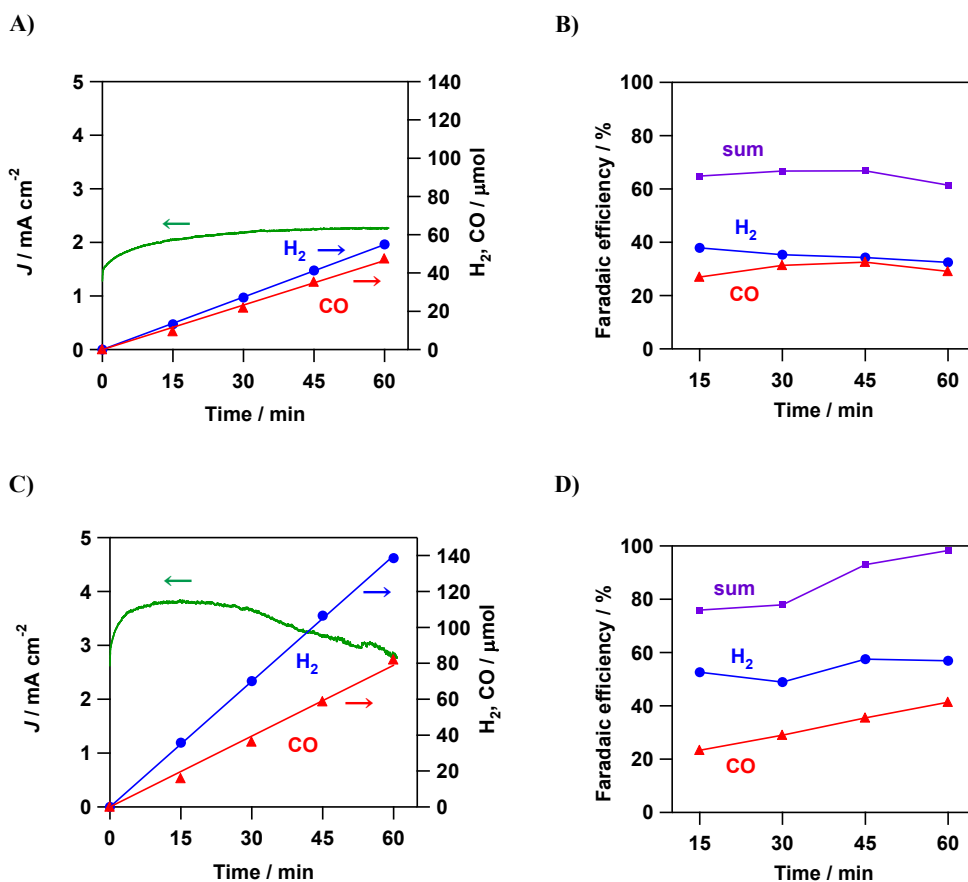

**Fig. S6.** (A) Chronoamperometry curves and time evolution of gaseous products in a three-electrode cell with the structure of GC | 0.1 M NaHCO<sub>3</sub> + 0.1 M Na<sub>2</sub>SO<sub>4</sub> aq. (pH 6.9) | Nafion | 0.1 M NaHCO<sub>3</sub> + 0.1 M Na<sub>2</sub>SO<sub>4</sub> aq. (pH 6.9) | FTO, Ag/AgCl under CO<sub>2</sub> flow with a constant rate of 100 mL min<sup>-1</sup>. The potential of FTO electrode was maintained at -0.9 V vs. RHE. Each pH is the value at the initial state. (B) Faradaic efficiency of CO and H<sub>2</sub> generation under the same conditions. (C) Chronoamperometry curves and time evolution of gaseous products in a three-electrode cell with the structure of GC | 0.1 M NaHCO<sub>3</sub> + 0.1 M (NH<sub>4</sub>)<sub>2</sub>SO<sub>4</sub> aq. (pH 6.9) | Nafion | 0.1 M NaHCO<sub>3</sub> + 0.1 M (NH<sub>4</sub>)<sub>2</sub>SO<sub>4</sub> aq. (pH 6.9) | FTO, Ag/AgCl under CO<sub>2</sub> flow with a constant rate of 100 mL min<sup>-1</sup>. The potential of FTO electrode was maintained at -0.9 V vs. RHE. (D) Faradaic efficiency of CO and H<sub>2</sub> generation under the same conditions.

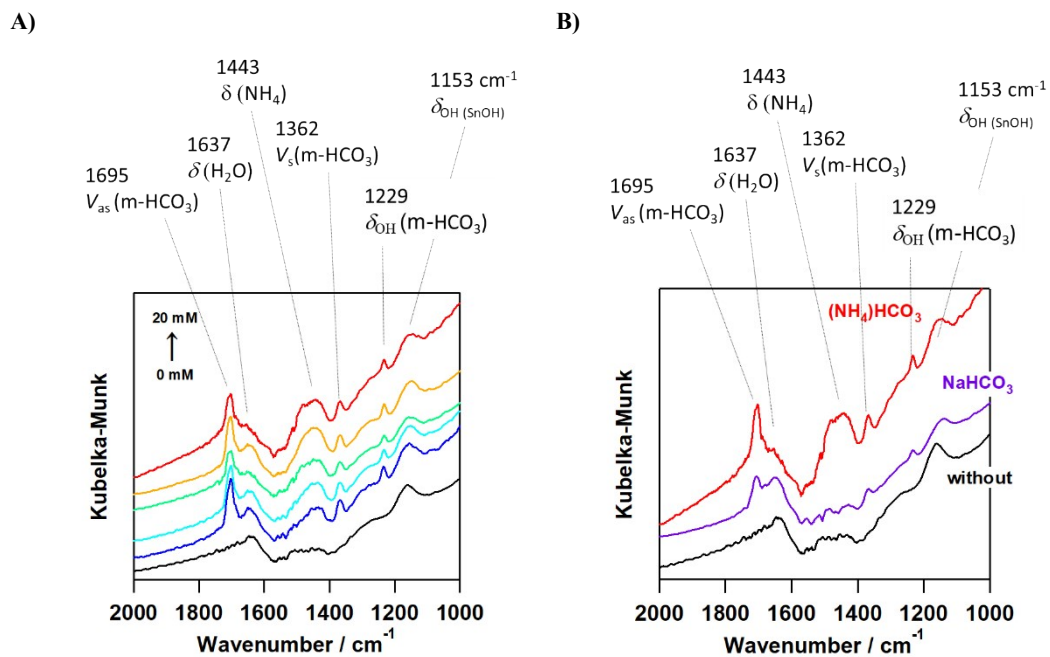

**Fig. S7.** (A) DRIFT spectra for  $\text{NH}_4^+$  ion-adsorbed FTO particles from  $(\text{NH}_4)\text{HCO}_3$  aqueous solutions with varying concentrations. (B) DRIFT spectra of  $\text{HCO}_3^-$  ion-adsorbed FTO particles from 20 mM  $(\text{NH}_4)\text{HCO}_3$  and 20 mM  $\text{NaHCO}_3$  aqueous solutions.
